# Supplementary material for: Enhanced hydrogen evolution catalysis in MoS2 nanosheets by incorporation of a metal phase
Source: Royal Society of Chemistry journal article supplement (doi:10.1039/c5ta08520a), 2015-01-01
Supplement: c5ta08520a1.pdf [file c5ta08520a1.pdf]

## Supporting information

### Enhanced Hydrogen Evolution Catalysis in MoS<sub>2</sub> nanosheets by incorporating of metal phase

Shoupeng Shi, Daqiang Gao\*, Baorui Xia, Peitao Liu, Desheng Xue.

Key Laboratory for Magnetism and Magnetic Materials of MOE, Lanzhou University,  
Lanzhou 730000, P. R. China.

\*E-mail: gaodq@lzu.edu.cn

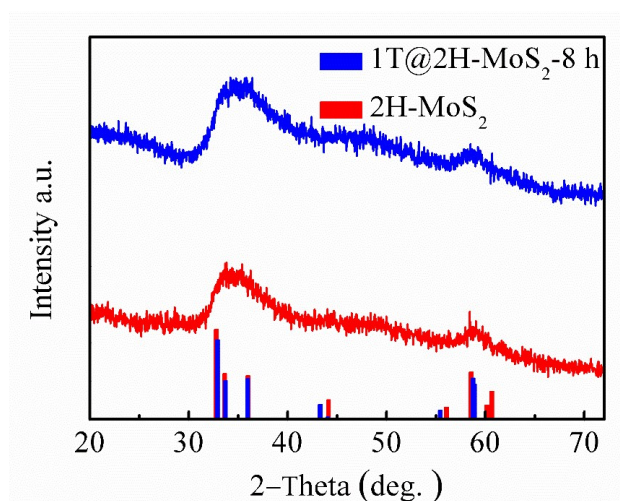

Figure S1: XRD patterns for sample 2H-MoS<sub>2</sub> and 1T@2H-MoS<sub>2</sub> nanosheets.

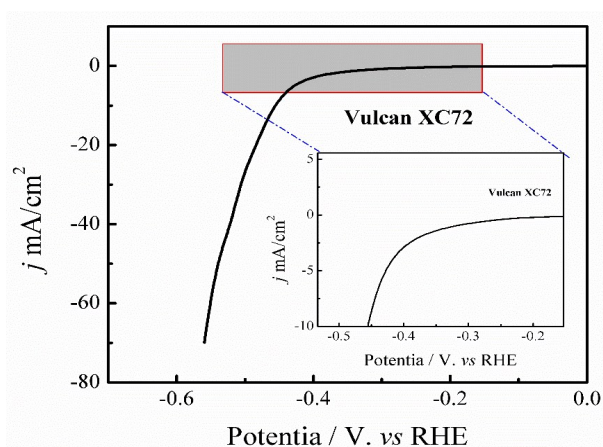

Figure S2: Polarization curve for Vulcan XC72 used in our case.
